# Supplementary material
Source: Springer Nature journal article supplement (https://www.springermedizin.de/resource/supplementary/12967_2012_1506_MOESM9_ESM.pdf/9574214)

Figure 3c. Dendritic cell-induced CD25, but not HLA-DR, expression on CD3<sup>-</sup>CD4<sup>+</sup> T-cells from patient L-HES<sub>2</sub> is inhibited by eosinophils.

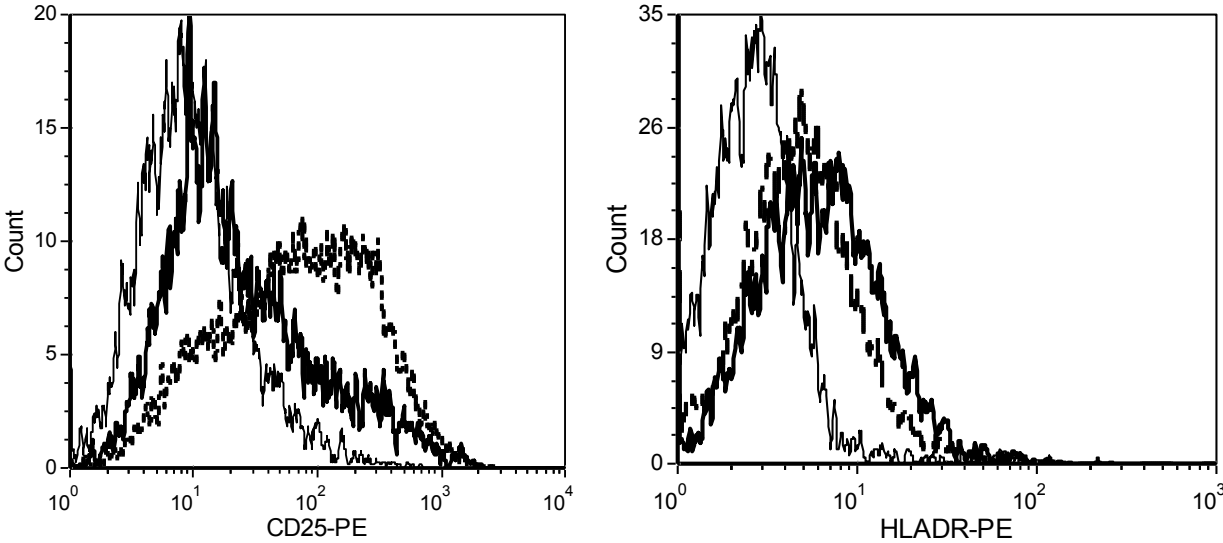

Supplement: MOESM9 [file 9574214]
